# Supplementary material
Source: Springer Nature journal article supplement (https://www.springermedizin.de/resource/supplementary/12913_2006_378_MOESM2_ESM.pdf/9535054)
Supplement: MOESM2 [file 9535054]

All the cities were classified into five levels/groups based on ten socio-economic indicators

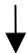

Sample cities were randomly selected from each group

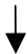

From the sample cities, 5 street offices were randomly selected

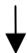

From sample street offices, two residential committee catchments were selected

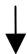

From the catchment area of each residential committee, 60 households were randomly selected

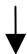

All the members in each household were interviewed using standard questionnaires
